# Supplementary material for: Major perturbations in the global carbon cycle and photosymbiont-bearing planktic foraminifera during the early Eocene
Source: Copernicus journal article supplement (doi:10.5194/cp-12-981-2016), 2016-04-15
Supplement: Supplementary file 1 [file Table S1.xlsx]

## Sheet: Possagno isotopes
Table S1. Stable isotopes from the Carcoselle Quarry (Possagno)
Thickness (0 m level= PETM)	δ13C (‰)	δ18O (‰)
-0.43	1.54559	-2.35972
-0.33	1.36663	-2.56583
-0.23	1.39347	-2.1957
-0.18	1.45846	-2.55498
-0.13	1.54982	-2.20835
-0.08	1.51299	-2.28616
-0.03	0.825254	-2.49645
0.01	0.715394	-2.62746
0.03	0.046204	-2.69788
0.08	0.0564258	-2.60033
0.13	0.26168	-2.51761
0.18	0.395224	-2.44219
0.23	0.363733	-2.57769
0.28	0.325183	-2.57133
0.33	0.855189	-1.95764
0.43	0.996418	-2.18587
0.53	1.07277	-1.90012
0.63	1.18725	-2.0712
0.73	1.15095	-2.19366
0.83	1.16971	-2.12867
0.98	1.19303	-2.39513
2	1.20561	-2.18092
2.5	1.09583	-2.26598
3	1.21021	-2.35753
3.5	1.32121	-1.97233
4	1.13155	-2.06095
4.5	1.13663	-1.75146
5	1.14745	-1.53644
5.5	1.18257	-1.68519
6	1.09325	-1.65522
6.5	1.03283	-1.79859
7	0.960201	-1.80495
7.5	0.97122	-1.70465
8	0.697123	-1.60623
8.5	0.704323	-1.62083
9	0.847698	-1.62499
9.5	0.860408	-1.74587
10	0.91	-1.39
10.5	0.62	//
11	0.8	//
11.5	0.73	-1.87
12	0.8	-1.66
12.5	0.55	-1.95
13	0.53	-1.99
13.5	0.61	-1.79
14.2	0.76	-1.35
14.4	0.87	-1.23
14.6	0.67	-1.74
14.8	1.02	-1.42
15	0.94	-1.51
15.2	0.94	-1.58
15.4	0.86	-1.79
15.6	0.7	-1.41
15.8	0.47	-1.97
16	0.76	-1.7
16.2	0.62	-2.16
16.4	0.76	-2.08
16.6	0.87	-1.79
16.8	-0.07	-3.25
17	0.31	-2.16
17.2	1	-1.66
17.4	0.38	-2.11
17.6	0.87	-1.63
17.8	0.57	-2.43
18	-0.22	-3.64
18.2	0.85	-1.9
18.4	1.25	-1.59
18.6	0.72	-2.59
18.8	0.67	-1.73
19	1.4	-1.49
19.2	1.38	-0.81
19.4	1.19	-1.6
19.6	0.88	-1.89
19.8	0.33	-2.31
20	0.83	-1.64
20.2	1.32	-1.91
20.4	0.97	-1.69
20.6	0.17	-2.27
20.8	0.61	-1.79
21	1.05	-1.87
21.2	1.68	-0.78
21.4	0.78	-2.72
21.6	//	//
21.8	1.2	-2.07
22	1.31	-1.96
22.2	1.13	-2.11
22.4	1.25	-1.99
22.6	1.47	-1.64
22.8	1.28	-1.72
23	1.57	-1.19
23.2	1.41	-1.76
23.4	1.47	-1.83
23.6	1.45	-1.69
23.8	1.44	-1.75
24	1.19	-1.91
24.2	1.26	-1.85
24.4	1.26	-1.94
24.7	1.38	-1.13
25	1.27	-1.81
25.2	1.4	-1.51
25.4	1.42	-1.5
25.6	1.11	-1.91
25.8	1.3	-1.92
26	1.3	-1.74
26.2	1.27	-1.38
26.4	1.18	-1.74
26.6	1.54	-1.11
26.8	1.43	-1.25
27	1.25	-1.66
27.2	1.35	-1.41
27.4	0.71	-2.45
27.6	0.83	-2.15
27.8	1.18	-1.62
28	1.24	-1.7
28.2	1.15	-1.74
28.4	1.25	-1.8
28.6	1.25	-1.62
28.8	1.09	-2.23
29	1.38	-1.92
29.2	1.2	-2.16
29.4	1.24	-1.79
29.6	1.24	-1.74
29.8	1.06	-2.23
30	1.12	-1.81
30.2	0.66	-2.4
30.4	1.12	-1.67
30.6	1.26	-1.66
30.8	1.2	-1.81
31	1.16	-1.94
31.2	1.27	-1.87
31.4	0.78	-3.1
31.6	1.29	-1.65
31.8	1.37	-2.18
32	1.62	-1.47
32.2	1.58	-1.7
32.4	1.39	-1.79
32.6	1.35	-1.84
32.8	1.63	-1.12
33	1.15	-2.29
33.2	0.75	-2.58
33.4	1	-2.02
33.6	1.36	-1.2
33.8	1.35	-1.63
34	1.45	-1.49
34.2	1.38	-1.73
34.4	1.36	-1.84
34.6	1.41	-1.63
34.8	1.48	-1.16
35	1.31	-1.87
35.2	1.36	-1.64
35.4	1.49	-1.77
35.6	1.28	-1.79
35.8	1.34	-1.72
36	1.72	-1.19
36.2	1.47	-1.69
36.4	1.39	-2.15
36.6	1.37	-1.74
36.8	1.54	-1.6
37	1.62	-1.43
37.2	1.54	-1.72
37.4	1.44	-1.86
37.6	1.82	-0.92
37.8	1.52	-1.65
38	1.24	-2.66
38.2	1.09	-1.83
38.4	1.31	-1.46
38.6	1.3	-1.71
38.8	1.49	-1.66
39	1.32	-1.75
39.2	1.01	-2.09
39.4	1.18	-2.19
39.6	1.33	-1.94
39.8	1.01	-1.98
40	1.5	-1.55
40.2	1.36	-1.91
40.4	1.1	-1.71
40.6	1.18	-1.78
40.8	1.24	-1.89
41	1.51	-1.63
41.2	1.46	-1.65
41.4	1.3	-1.98
41.6	1.4	-1.52
41.8	1.38	-1.69
42	1.47	-1.44
42.2	1.49	-1.43
42.4	1.38	-1.65
42.6	1.4	-1.66
42.8	1.4	-1.67
43	1.56	-1.42
43.2	1.24	-2.19
43.4	1.55	-1.41
43.6	1.59	-1.27
43.8	1.48	-1.73
44	1.32	-1.84
44.2	1.47	-1.61
44.4	1.54	-1.41
44.6	1.59	-1.27
44.8	1.29	-2.02
45	1.34	-1.66
45.2	1.36	-1.71
45.6	1.44	-1.46
45.8	1.43	-1.55
46	1.35	-1.59
46.2	1.4	-1.64
46.4	1.31	-1.43
46.6	1.34	-1.42
46.8	1.2	-1.89
47	1.16	-1.58
47.2	1.19	-1.67
47.4	1.18	-1.65
47.6	1.23	-1.73
47.8	1.29	-1.56
48	1.26	-1.7
48.2	1.14	-1.78
48.4	1.53	-1.03
48.6	1.24	-1.82
48.8	1.33	-1.13
49	1.24	-1.43
49.2	0.82	-2.21
49.4	0.5	-2.55
49.6	0.9	-1.57
49.8	1.01	-1.48
50	0.99	-1.59
50.2	1.16	-1.28
50.4	1.13	-1.44
50.6	1.13	-1.61
50.8	1.14	-1.63
51	1.32	-1.25
51.2	1.21	-1.71
51.4	1.14	-1.69
51.6	1.14	-1.69
51.8	1.17	-1.7
52.2	1.26	-1.37
52.4	1.3	-1.48
52.6	1.25	-1.36
52.8	1.3	-1.26
53	0.96	-2.02
53.2	0.93	-1.8
53.4	1.03	-1.36
53.6	1.18	-1.14
53.8	1.1	-1.29
54	1.15	-1.11
54.2	1.05	-1.29
54.4	1.08	-1.25
54.6	0.96	-1.58
54.8	1.07	-1.5
55	0.74	-1.99
55.2	1.15	-1.45
55.4	1.18	-1.29
55.6	1.19	-1.25
55.8	1.1316	-1.33445
56	0.958975	-1.56623
56.2	0.878456	-1.7612
56.4	1.08617	-1.27144
56.6	1.14635	-1.45159
56.8	1.10416	-1.26047
57	0.858609	-1.92893
57.2	0.932505	-1.84835
57.4	0.892621	-1.39387
57.6	0.87	-1.86
57.8	1.07809	-1.06468
58	1.02871	-1.34884
58.2	0.924471	-1.60841
58.4	1.02812	-1.32306
58.6	1.11858	-1.22202
58.8	1.07577	-1.52246
59	1.0805	-1.48296
59.25	1.19427	-1.51955
59.5	1.22572	-1.32404
59.75	1.21848	-1.39317
60	1.25095	-1.41745
60.25	1.20094	-1.49859
60.5	1.29142	-1.43064
60.75	1.27794	-1.35861
61	1.31356	-1.3997
61.25	1.09574	-1.87022
61.5	1.17802	-1.71506
61.75	1.20994	-1.47336
62	1.26876	-1.22621
62.25	1.28272	-1.41107
62.5	1.2556	-1.7556
62.75	1.2774	-1.58531
63	1.32844	-1.37782
63.25	1.25847	-1.40539
63.5	1.3694	-1.35492
63.75	1.24229	-1.65417
64	1.15759	-1.66485
64.35	1.04803	-1.8438
64.5	1.27149	-1.44995
64.75	1.3377	-1.36551
65.1	1.28953	-1.3349
65.4	1.30633	-1.28577
65.7	1.3012	-1.36369
66	1.3245	-1.55413
