# Supplementary material for: Major perturbations in the global carbon cycle and photosymbiont-bearing planktic foraminifera during the early Eocene
Source: Copernicus journal article supplement (doi:10.5194/cp-12-981-2016), 2016-04-15
Supplement: Supplementary file 3 [file Table S2.xlsx]

## Sheet: Sheet2
Table S2. Stable isotope composition of early Eocene bulk carbonate at Site 577
Hole	Core	Section	Interval		Depth	Offset	Depth	δ13C	δ180
			top (cm)	bott. (cm)	(mbsf)	(m)	(mcd)	(‰)	(‰)
577*	8	3	30	32	67.1	-3.5	63.6	2.04631	0.105474
577*	8	3	35	37	67.15	-3.5	63.65	2.18554	-0.108517
577*	8	3	45	47	67.25	-3.5	63.75	2.24459	-0.01454
577*	8	3	50	52	67.3	-3.5	63.8	2.17832	0.222182
577*	8	3	55	57	67.35	-3.5	63.85	2.20877	-0.031719
577*	8	3	60	62	67.4	-3.5	63.9	2.32766	0.608951
577*	8	3	65	67	67.45	-3.5	63.95	2.13519	-0.61
577*	8	3	70	72	67.5	-3.5	64	2.09064	0.069788
577*	8	3	75	77	67.55	-3.5	64.05	2.09453	-0.244936
577*	8	3	80	82	67.6	-3.5	64.1	2.02512	0.035066
577*	8	3	85	87	67.65	-3.5	64.15	2.14487	-0.284346
577*	8	3	90	92	67.7	-3.5	64.2	2.13881	-0.031486
577*	8	3	95	97	67.75	-3.5	64.25	2.08194	-0.177232
577*	8	3	100	102	67.8	-3.5	64.3	2.00007	0.02349
577*	8	3	105	107	67.85	-3.5	64.35	1.95313	-0.165295
577*	8	3	110	112	67.9	-3.5	64.4	1.74399	-0.484611
577*	8	3	115	117	67.95	-3.5	64.45	2.14291	-0.030905
577*	8	3	120	122	68	-3.5	64.5	2.06773	-0.246375
577*	8	3	125	127	68.05	-3.5	64.55	1.97153	-0.242089
577*	8	3	130	132	68.1	-3.5	64.6	1.97716	-0.398771
577*	8	3	135	137	68.15	-3.5	64.65	1.88439	-0.229963
577*	8	3	140	142	68.2	-3.5	64.7	1.86925	-0.571419
577*	8	3	145	147	68.25	-3.5	64.75	2.07223	-0.208744
577*	8	4	5	7	68.35	-3.5	64.85	1.98218	-0.067281
577*	8	4	10	12	68.4	-3.5	64.9	1.94729	-0.576242
577*	8	4	15	17	68.45	-3.5	64.95	1.89504	-0.339091
577*	8	4	20	22	68.5	-3.5	65	1.98776	-0.312928
577*	8	4	25	27	68.55	-3.5	65.05	2.02866	-0.369404
577*	8	4	30	32	68.6	-3.5	65.1	2.04172	-0.355366
577*	8	4	35	37	68.65	-3.5	65.15	2.01801	-0.256235
577*	8	4	40	42	68.7	-3.5	65.2	2.01763	-0.334147
577*	8	4	45	47	68.75	-3.5	65.25	1.91537	-0.208744
577*	8	4	50	52	68.8	-3.5	65.3	1.74592	-0.487507
577*	8	4	55	57	68.85	-3.5	65.35	1.93667	-0.262297
577*	8	4	60	62	68.9	-3.5	65.4	2.01474	-0.368869
577*	8	4	65	67	68.95	-3.5	65.45	1.9967	-0.10871
577*	8	4	70	72	69	-3.5	65.5	2.03594	-0.504866
577*	8	4	75	77	69.05	-3.5	65.55	1.89601	-0.074355
577*	8	4	80	82	69.1	-3.5	65.6	2.00414	-0.308104
577*	8	4	85	87	69.15	-3.5	65.65	1.91247	-0.182472
577*	8	4	90	92	69.2	-3.5	65.7	1.95886	-0.533804
577*	8	4	95	97	69.25	-3.5	65.75	1.9938	-0.371426
577*	8	4	100	102	69.3	-3.5	65.8	1.96656	-0.481719
577*	8	4	105	107	69.35	-3.5	65.85	2.00736	-0.376477
577*	8	4	110	112	69.4	-3.5	65.9	2.0581	-0.53766
577*	8	4	115	117	69.45	-3.5	65.95	2.0364	-0.247141
577*	8	4	120	122	69.5	-3.5	66	1.99354	-0.538624
577*	8	4	125	127	69.55	-3.5	66.05	1.98702	-0.212785
577*	8	4	130	132	69.6	-3.5	66.1	1.95693	-0.353438
577*	8	4	135	137	69.65	-3.5	66.15	1.98121	-0.264318
577*	8	4	140	142	69.7	-3.5	66.2	2.0263	-0.383336
577*	8	4	145	147	69.75	-3.5	66.25	2.01316	-0.089512
577*	8	5	5	7	69.85	-3.5	66.35	1.86309	-0.185504
577*	8	5	15	17	69.95	-3.5	66.45	1.83888	-0.312819
577*	8	5	25	27	70.05	-3.5	66.55	1.86696	-0.290589
577*	8	5	35	37	70.15	-3.5	66.65	1.98605	-0.262297
577*	8	5	45	47	70.25	-3.5	66.75	2.01026	-0.366373
577*	8	5	55	57	70.35	-3.5	66.85	1.89601	-0.361321
577*	8	5	65	67	70.45	-3.5	66.95	1.96475	-0.153169
577*	8	5	70	72	70.5	-3.5	67	1.99643	-0.471108
577*	8	5	75	77	70.55	-3.5	67.05	1.98896	-0.485606
577*	8	5	80	82	70.6	-3.5	67.1	1.98487	-0.316784
577*	8	5	85	87	70.65	-3.5	67.15	2.02672	-0.422958
577*	8	5	90	92	70.7	-3.5	67.2	1.91453	-0.592641
577*	8	5	95	97	70.75	-3.5	67.25	1.99186	-0.149128
577*	8	5	100	102	70.8	-3.5	67.3	1.91164	-0.560811
577*	8	5	105	107	70.85	-3.5	67.35	1.93861	-0.434073
577*	8	5	115	117	70.95	-3.5	67.45	1.98896	-0.133971
577*	8	5	125	127	71.05	-3.5	67.55	1.84373	-0.182472
577*	8	5	135	137	71.15	-3.5	67.65	1.70721	-0.167315
577*	8	5	145	147	71.25	-3.5	67.75	1.82242	-0.231984
577*	8	6	5	7	71.35	-3.5	67.85	1.83985	-0.270381
577*	8	6	15	17	71.45	-3.5	67.95	1.94732	-0.31484
577*	8	6	20	22	71.5	-3.5	68	1.97331	-0.601321
577*	8	6	25	27	71.55	-3.5	68.05	1.86018	-0.329997
577*	8	6	28	30	71.58	-3.5	68.08	1.77001	-0.500046
577*	8	6	32	34	71.62	-3.5	68.12	1.691	-0.485579
577*	8	6	35	37	71.65	-3.5	68.15	1.62491	-0.547243
577*	8	6	37	39	71.67	-3.5	68.17	1.62837	-0.545376
577*	8	6	45	47	71.75	-3.5	68.25	2.01704	-0.441146
577*	8	6	50	52	71.8	-3.5	68.3	2.06773	-0.209721
577*	8	6	55	57	71.85	-3.5	68.35	2.04128	-0.18168
577*	8	6	60	62	71.9	-3.5	68.4	1.95404	-0.248303
577*	8	6	67	69	71.97	-3.5	68.47	1.88347	-0.231193
577*	8	6	75	77	72.05	-3.5	68.55	1.9251	-0.157428
577*	8	6	85	87	72.15	-3.5	68.65	1.58044	-0.274643
577*	8	6	95	97	72.25	-3.5	68.75	1.71502	-0.104883
577*	8	6	105	107	72.35	-3.5	68.85	1.66564	-0.209973
577*	8	6	108	110	72.38	-3.5	68.88	1.74688	-0.284957
577*	8	6	112	114	72.42	-3.5	68.92	1.63319	-0.249267
577*	8	6	115	117	72.45	-3.5	68.95	1.42457	-0.552523
577*	8	6	118	120	72.48	-3.5	68.98	1.39327	-0.624468
577*	8	6	122	124	72.52	-3.5	69.02	1.51275	-0.65919
577*	8	6	125	127	72.55	-3.5	69.05	1.84668	-0.308999
577*	8	6	135	137	72.65	-3.5	69.15	1.80118	-0.341334
577*	8	6	145	147	72.75	-3.5	69.25	1.75374	-0.303947
577*	9	1	5	7	73.35	0	73.35	1.47879	-0.292831
577*	9	1	10	12	73.4	0	73.4	1.50418	-0.10211
577*	9	1	15	17	73.45	0	73.45	1.38391	-0.083664
577*	9	1	20	22	73.5	0	73.5	1.48106	-0.256469
577*	9	1	25	27	73.55	0	73.55	1.45555	-0.20391
577*	9	1	30	32	73.6	0	73.6	1.47817	-0.406003
577*	9	1	35	37	73.65	0	73.65	1.47201	-0.216036
577*	9	1	40	42	73.7	0	73.7	1.47528	-0.364519
577*	9	1	45	47	73.75	0	73.75	1.47879	-0.348408
577*	9	1	50	52	73.8	0	73.8	1.45602	-0.4581
577*	9	1	55	57	73.85	0	73.85	1.45749	-0.261507
577*	9	1	60	62	73.9	0	73.9	1.44542	-0.19183
577*	9	1	65	67	73.95	0	73.95	1.46136	-0.18269
577*	9	1	70	72	74	0	74	1.43868	-0.155171
577*	9	1	75	77	74.05	0	74.05	1.41586	-0.114988
577*	9	1	80	82	74.1	0	74.1	1.27684	-0.142629
577*	9	1	85	87	74.15	0	74.15	1.18253	-0.311021
577*	9	1	90	92	74.2	0	74.2	1.23638	-0.19569
577*	9	1	95	97	74.25	0	74.25	1.2019	-0.33224
577*	9	1	100	102	74.3	0	74.3	1.3462	-0.25454
577*	9	1	105	107	74.35	0	74.35	1.33453	-0.156418
577*	9	1	115	117	74.45	0	74.45	1.2658	-0.093769
577*	9	1	125	127	74.55	0	74.55	1.32582	-0.369628
577*	9	1	127	129	74.57	0	74.57	1.34042	-0.190865
577*	9	1	130	132	74.6	0	74.6	1.37221	-0.061591
577*	9	1	133	135	74.63	0	74.63	1.37895	-0.117545
577*	9	1	135	137	74.65	0	74.65	1.31323	-0.129135
577*	9	1	145	147	74.75	0	74.75	1.30355	-0.11802
577A	8	1	115	117	67.55	-1.3	66.25	2.03257	-0.142271
577A	8	1	125	127	67.65	-1.3	66.35	2.03741	-0.198858
577A	8	1	135	137	67.75	-1.3	66.45	1.93382	-0.049307
577A	8	2	5	7	67.95	-1.3	66.65	1.87282	-0.348408
577A	8	2	15	17	68.05	-1.3	66.75	1.93091	-0.206941
577A	8	2	25	27	68.15	-1.3	66.85	2.02386	-0.16147
577A	8	2	35	37	68.25	-1.3	66.95	2.01224	-0.264538
577A	8	2	45	47	68.35	-1.3	67.05	2.06355	-0.209973
577A	8	2	55	57	68.45	-1.3	67.15	1.62326	-0.476143
577A	8	2	65	67	68.55	-1.3	67.25	1.9689	-0.345824
577A	8	2	75	77	68.65	-1.3	67.35	1.96309	-0.458969
577A	8	2	85	87	68.75	-1.3	67.45	2.0086	-0.324609
577A	8	2	95	97	68.85	-1.3	67.55	1.86143	-0.242781
577A	8	2	105	107	68.95	-1.3	67.65	1.61454	-0.719607
577A	8	2	115	117	69.05	-1.3	67.75	1.93308	-0.320568
577A	8	2	125	127	69.15	-1.3	67.85	1.95825	-0.371079
577A	8	2	135	137	69.25	-1.3	67.95	1.89726	-0.324609
577A	8	2	145	147	69.35	-1.3	68.05	1.80044	-0.327639
577A	8	3	5	7	69.45	-1.3	68.15	1.97278	-0.5509
577A	8	3	15	17	69.55	-1.3	68.25	2.08702	-0.481194
577A	8	3	25	27	69.65	-1.3	68.35	2.06337	-0.480139
577A	8	3	35	37	69.75	-1.3	68.45	2.08121	-0.571104
577A	8	3	45	47	69.85	-1.3	68.55	1.95825	-0.429672
577A	8	3	55	57	69.95	-1.3	68.65	1.68232	-0.518572
577A	8	3	65	67	70.05	-1.3	68.75	1.76074	-0.322588
577A	8	3	75	77	70.15	-1.3	68.85	1.66779	-0.475132
577A	8	3	85	87	70.25	-1.3	68.95	1.7162	-0.37007
577A	8	3	95	97	70.35	-1.3	69.05	1.33958	-0.634747
577A	8	3	105	107	70.45	-1.3	69.15	1.81012	-0.614543
577A	8	3	115	117	70.55	-1.3	69.25	1.72686	-0.337742
577A	8	3	125	127	70.65	-1.3	69.35	1.6707	-0.698392
577A	8	3	135	137	70.75	-1.3	69.45	1.93695	-0.502408
577A	8	3	145	147	70.85	-1.3	69.55	1.93405	-0.438765
577A	8	4	5	7	70.95	-1.3	69.65	2.02312	-0.408457
577A	8	4	15	17	71.05	-1.3	69.75	1.86531	-0.512511
577A	8	4	25	27	71.15	-1.3	69.85	1.72589	-0.290261
577A	8	4	30	32	71.2	-1.3	69.9	1.40284	-0.452011
577A	8	4	35	37	71.25	-1.3	69.95	1.42187	-0.812547
577A	8	4	40	42	71.3	-1.3	70	1.59164	-0.559087
577A	8	4	45	47	71.35	-1.3	70.05	1.77623	-0.435734
577A	8	4	50	52	71.4	-1.3	70.1	1.76503	-0.283197
577A	8	4	55	57	71.45	-1.3	70.15	1.72201	-0.46301
577A	8	4	60	62	71.5	-1.3	70.2	1.62324	-0.030446
577A	8	4	65	67	71.55	-1.3	70.25	1.479	-0.611512
577A	8	4	70	72	71.6	-1.3	70.3	1.44312	-0.316934
577A	8	4	75	77	71.65	-1.3	70.35	1.15659	-1.02772
577A	8	4	80	82	71.7	-1.3	70.4	1.49128	-0.363235
577A	8	4	85	87	71.75	-1.3	70.45	1.54967	-0.762036
577A	8	4	90	92	71.8	-1.3	70.5	1.47394	-0.292821
577A	8	4	95	97	71.85	-1.3	70.55	1.42091	-0.922662
577A	8	4	100	102	71.9	-1.3	70.6	1.41037	-0.378667
577A	8	4	105	107	71.95	-1.3	70.65	1.48674	-0.73375
577A	8	4	110	112	72	-1.3	70.7	1.45756	-0.421112
577A	8	4	115	117	72.05	-1.3	70.75	1.40057	-1.22977
577A	8	4	120	122	72.1	-1.3	70.8	1.50765	-0.448121
577A	8	4	125	127	72.15	-1.3	70.85	1.40445	-0.749913
577A	8	4	130	132	72.2	-1.3	70.9	1.33523	-0.326582
577A	8	4	135	137	72.25	-1.3	70.95	1.08978	-1.11056
577A	8	4	138	140	72.28	-1.3	70.98	1.21001	-0.718209
577A	8	5	5	7	72.45	-1.3	71.15	1.3996	-1.1146
577A	8	5	10	12	72.5	-1.3	71.2	1.42385	-0.246519
577A	8	5	15	17	72.55	-1.3	71.25	1.31703	-0.669773
577A	8	5	20	22	72.6	-1.3	71.3	1.22446	-0.315005
577A	8	5	25	27	72.65	-1.3	71.35	1.38093	-0.900166
577A	8	5	30	32	72.7	-1.3	71.4	1.34487	-0.309217
577A	8	5	35	37	72.75	-1.3	71.45	1.3422	-0.733435
577A	8	5	40	42	72.8	-1.3	71.5	1.27359	-0.396032
577A	8	5	45	47	72.85	-1.3	71.55	1.26668	-0.716256
577A	8	5	50	52	72.9	-1.3	71.6	0.943031	-0.638446
577A	8	5	55	57	72.95	-1.3	71.65	1.26087	-0.858735
577A	8	5	60	62	73	-1.3	71.7	1.26203	-0.300537
577A	8	5	65	67	73.05	-1.3	71.75	1.39739	-0.754655
577A	8	5	70	72	73.1	-1.3	71.8	1.36028	-0.287997
577A	8	5	75	77	73.15	-1.3	71.85	1.38577	-0.630364
577A	8	5	80	82	73.2	-1.3	71.9	1.37184	-0.344906
577A	8	5	85	87	73.25	-1.3	71.95	1.40417	-0.662699
577A	8	5	90	92	73.3	-1.3	72	1.33409	-0.302698
577A	8	5	95	97	73.35	-1.3	72.05	1.32768	-0.618238
577A	8	5	100	102	73.4	-1.3	72.1	1.3911	-0.361307
577A	8	5	105	107	73.45	-1.3	72.15	1.32574	-0.599039
577A	8	5	110	112	73.5	-1.3	72.2	1.31693	-0.323686
577A	8	5	115	117	73.55	-1.3	72.25	1.41192	-0.690994
577A	8	5	120	122	73.6	-1.3	72.3	1.36702	-0.253272
577A	8	5	125	127	73.65	-1.3	72.35	1.28314	-0.612176
577A	8	5	130	132	73.7	-1.3	72.4	1.33331	-0.246519
577A	8	5	135	137	73.75	-1.3	72.45	1.25506	-0.754655
577A	8	6	5	7	73.95	-1.3	72.65	1.12629	-0.712214
577A	8	6	15	17	74.05	-1.3	72.75	1.36157	-0.845599
577A	8	6	25	27	74.15	-1.3	72.85	1.47291	-0.728382
577A	8	6	35	37	74.25	-1.3	72.95	1.66074	-0.571756
