# Supplementary material for: Major perturbations in the global carbon cycle and photosymbiont-bearing planktic foraminifera during the early Eocene
Source: Copernicus journal article supplement (doi:10.5194/cp-12-981-2016), 2016-04-15
Supplement: Supplementary file 5 [file Table S3.xlsx]

## Sheet: Sheet1
Table S1. Abundances of planktic foraminiferal genera, fragmentation index (%) and coarse fraction (%) at the Carcoselle Quarry (Possagno)
		Relative abundance (%) of total number of counted specimens
Thickness (m above the PETM)	No. counted specimens	Morozo- velloides	Moroz- ovella	Acarinina	Subbotinids		Turborotalia fontosa	Guembelit- roides nuttallii	Globano- malina australiformis	Planoglobano- malina pseudoalgeriana	Pseudo- hastigerina	Plano- rotalites	Igorina	Biserials		Thickness (m above the PETM)	F index (%)	Thickness (m above the PETM)	Coarse fraction (%)
0.975	302		25.4	26.5	41.4			0	1.5		2	1.1	0.3	1.8		0.975	9.5	0.975	15.805
3	296		31.3	36	27.5			0	1	0	0.6	1.6	0	2		3	13	2	16.813
5	287		23.5	35.9	34.9			0	1.8	0	1	1.4	0.5	1		6	9	2.5	10.8234
6	312		20.9	37	39.3			0	1.3	0	0.5	1	0	0		8	62.4	3	7.36723
6.5	325		26	37.3	33.5			0	1.8	0	0.3	0.6	0	0.5		8.5	58.5	3.5	7.1386
7	363		23.7	36.4	33.5			0	3.5	0	0.5	0.5	0	1.9		9	12.3	4	8.57242
7.5	350		27	54.5	15.8			0	1.3	0	0.5	0.3	0.3	0.3		12	16.2	4.5	9.0468
8	369		24	59	11			0	3	0	1	1	0.5	0.5		12.5	57.2	5	8.83333
8.5	282		15.3	65.3	15			0	1.5	0	2	0.3	0.3	0.3		13	67.1	5.5	7.74326
9	295		18.5	57.3	22.5			0	1	0	0.5	0.2	0	0		14.6	50	6	9.70404
9.5	302		29.6	40.6	27.7			0	0.5	0	0.3	1	0	0.3		14.8	68.7	6.5	9.15676
10	328		25.7	29.5	30			0	5.8	0	4	4.5	0	0.5		15.2	66.8	7	14.5227
10.5	302		22	48	26			0	1	0	1.5	1.5	0	0		15.6	25	7.5	10.1447
11	315		27.3	40	29.5			0	1.2	0	1	0.8	0.2	0		15.8	60.2	8	8.58635
11.5	298		27	44	27.4			0	0.7	0	0.3	0.3	0	0.3		16.2	20	8.5	8.77368
12	317		26.4	50	22			0	0.8	0	0.5	0.3	0	0		16.4	34	9	9.01553
12.5	340		16.5	56.5	18.5			0	4	0	2.9	0.5	0.8	0.3		16.6	60	9.5	11.6158
13	308		26.2	55	15.2			0	1.5	0	1	0.3	0.3	0.5		16.8	62	10	11.0062
13.5	296		19	60	17.9			0	1.4	0	1.2	0.5	0	0		17	31	10.5	9.4154
14.4	304		16	55.2	27			0	0.5	0	1	0.3	0	0		17.6	45.3	11	11.6151
14.6	320		8.4	53.1	30.4			0.1	2.7	0	3.5	1	0.5	0.3		18	70	11.5	12.9336
15	305		10.6	53.8	29			0	2.5	0	2.8	1	0	0.3		18.4	35.5	12	7.43273
15.6	314		3.5	71.5	19			0	1.5	0	1.5	2.4	0.3	0.3		18.6	24	12.5	12.5456
16	301		11	56	24.6			0	5.9	0	2	0.5	0	0		19.2	62	13	13.1283
16.2	330		6.7	64.6	23.9			0	1.5	0.3	1	2	0	0		19.4	41.5	13.5	11.0586
16.4	317		3.4	67	22.2			0	0.3	1.5	1.5	3.5	0.6	0		19.8	60.1	14.2	13.0394
16.6	305		4.2	73.5	19			0	1.5	0	0.3	0.6	0.3	0.6		20.4	57.9	14.4	7.04958
16.8	348		3.2	80	8.6			0	3.1	1.5	0.5	2.8	0	0.3		21	23.5	14.6	8.51043
17	301		7.2	71.4	17.1			0	0.3	1	0.7	2	0.3	0		22.2	28.5	14.8	7.3194
17.2	295		9	72.7	10.3			0	5	0.5	1.5	1	0	0		26.4	24.8	15	13.8634
17.4	325		8.3	73.8	8			0	6.3	0.6	2.5	0.5	0	0		27.2	12.1	15.2	6.65053
17.6	310		8	72.5	10.1			0	5.5	0.3	3	0.3	0.3	0		27.4	50.5	15.4	8.29918
17.8	342		4	78.9	8.7			0	1.3	0	5.5	1.3	0	0.3		27.6	50	15.6	5.3129
18	312		2.7	79.2	8.9			0	1.8	2.3	1.8	2.3	1	0		28.2	17.9	15.8	5.40733
18.2	289		8.5	67.5	11.5			0	6.5	0.3	5.1	0.3	0	0.3		30	45.8	16	5.95436
18.4	295		9.5	68.5	12.5			0	6.5	1	2	0	0	0		30.6	11.8	16.2	5.37164
18.6	304		8.5	69.4	14.5			0	5.5	0.3	1.8	0	0	0		31.4	42.5	16.4	5.54955
18.8	328		9	64.7	16.5			0	4.5	0.5	4.5	0.3	0	0		33	31.4	16.6	7.46931
19	298		11.5	66.5	14.4			0	3.8	0	3.5	0	0.3	0		35.2	12	16.8	6.92453
19.2	308		12	67.3	12.5			0	3.5	0.3	4.1	0.3	0	0		37.2	10	17	4.89676
19.4	293		3.8	72.3	11			0.3	3.5	1.5	3.8	3	0.5	0.3		37.8	52	17.2	5.6351
19.6	307		10.5	68.5	10.3			0	3	3.5	2.7	1.5	0	0		39	55.2	17.4	5.84783
19.8	298		10.1	69.5	13			0.3	2.8	1	2.5	0.5	0.3	0		39.6	49.5	17.6	4.26844
20	341		10	62.4	20			0	2.4	2	0.3	2.4	0.5	0		40.2	48.2	17.8	6.19048
20.2	302		6.3	65.8	19.5			0	3	0.3	3	1.8	0.3	0		40.8	15	18	3.52876
20.4	315		8.5	60.8	23.5			0	2.9	0.5	2.3	1.5	0	0		41.4	18	18.2	5.43987
20.6	322		7	59	23.9			0	2.7	2.5	1.8	2.5	0.6	0		42	15	18.4	6.05174
20.8	289		4	35.2	41.6			0	5.3	4.8	5.8	2.8	0.5	0		43.2	11	18.6	6.59231
21	302		3.8	41.8	38			0	2.5	6	4.6	3.3	0	0		45	10	18.8	5.13855
21.2	297		5	34.8	49.1			0	3.9	3.3	1.1	2.2	0.6	0		45.6	9.2	19	6.06526
21.4	330		7.5	40	38			0	4.7	3	4.5	2	0.3	0		47.4	10	19.2	5.79054
21.6	315		3.8	43.3	40.5			0	3	2.7	3.2	2.5	0	1		49.2	11.4	19.4	5.10699
21.8	290		9	38.5	33.2			0	2.5	5.5	9	2	0.3	0		49.4	16	19.6	5.43813
22	307		4.7	38	36.5			0	3.8	5	9.5	2.5	0	0		49.8	12.1	19.8	5.55447
22.2	315		7.5	41	38			0	3.5	4.5	4.5	1	0	0		50.4	23.2	20	3.53879
22.6	296		7.3	38.8	37.5			0	4.5	3.8	4.8	2.7	0.6	0		51.6	12	20.2	5.35394
23.4	303		7	40.5	38.8			0	3.5	3.2	5.3	1.4	0.3	0		52.2	13.5	20.4	5.75754
23.6	320		8.3	42.3	37.5			0	2.6	2.5	4.5	1.5	0.8	0		53	12	20.6	7.06479
23.8	276		8	38	43			0	1.3	1	7.4	1	0.3	0		53.2	12	20.8	5.63808
24.2	321		9.8	42.5	42.5			0.2	1	0	2.3	0	1.7	0		53.4	15	21	5.11405
24.7	294		1.3	43.3	42.3			1	1.6	0	4.3	1.6	4.3	0.3		53.8	10.5	21.2	7.35914
25.8	327		4	55.4	32.7			0	0	0	4	1.5	2.4	0		54	12.5	21.4	4.5346
26.8	301		9.5	44	39.5			2.3	0.3	0	3.8	0	0.3	0.3		54.6	11	21.6	8.35744
27.4	280		5	75.9	15.6			0	0	0	0.3	1.3	1.9	0		55	23	21.8	8.57393
27.6	264		1.1	68.9	22.7			0	0.5	0.3	3.5	1.5	1.5	0		55.8	10	22	8.52128
28.2	327		9.5	45	33.7			0.3	0.8	0	9.3	0.8	0.3	0.3		56	10	22.2	7.22671
29.4	297		6.1	52	29			0.3	1.5	0	8.8	2	0	0.3		56.2	15	22.6	5.8296
30.6	317		9.3	48	31.7			0	0	0	9	2	0	0		56.4	13	23	7.64243
31.4	315		1.5	81	10.6			0	0.4	0	1.4	1	4.1	0		56.6	11	23.4	4.04358
32.4	320		6.4	48	32.3			0	0	0	11.8	1	0.5	0		57	18	23.8	7.6188
33	307		5.6	64.1	21.5			0	0.2	0	8.2	0.3	0.1	0		57.6	35	24.2	6.90019
33.6	289		9.7	48.5	31.8			0	1.5	0	7.7	0	0.5	0.3		58.2	6.5	24.7	7.53117
34.2	290		6	51	32.1			0.3	1.5	0	6	2.1	1	0		60.25	11	25.2	7.96403
35.4	314		5	48	32.7			1.7	1.8	0	3.9	3.9	3	0		61	13.8	25.6	6.34393
36	315		5.2	48.5	30			2.9	1.7	0	4.7	2.8	4.2	0		62.5	7	25.8	4.79016
36.6	336		6.9	51	29.9			3	2	0.0	2.7	1.6	2.6	0.3		64	6.5	26	5.53713
36.8	312		6.3	53	28.3			1	4	0	3	0.4	4	0		66	7.4	26.4	5.74615
37.2	333		6.2	45.5	39			0	2.6	0	2.8	0.7	3.1	0.1				26.8	5.0785
37.8	311		6.8	61.9	22.9			0	2	0	2.6	1.7	1.8	0.3				27.2	5.15307
38	317		3.6	59.4	31.3			0	1	0	2.1	1	1.3	0.3				27.4	3.60217
38.4	294	0.3	2	46.4	37.8			0	4.3	0	3.2	3.4	2.6	0				27.6	4.33755
39	323	0.3	3.3	65.1	24.3			0	1.5	0	3.2	1.5	0.5	0.3				28.2	6.24228
39.6	290	0.6	5.3	69.1	19.2			0	1.3	0	2.8	1	0.5	0.2				28.8	4.54196
40.2	307	0.5	2.4	65	26		0.3	0.5	1.5	0	2.4	0.4	1	0				29.4	5.07455
40.8	358	1.8	6.3	42.2	43.4		0	0	1.6	0	2.9	0.5	1.3	0				30	4.93145
42	310	1	5.4	41.2	39.1		0.5	0.5	3.6	0.3	2.9	2.5	2.7	0.3				30.6	5.57639
43.2	298	3	7.5	39.7	40		0.3	0	2.7	0.3	2.3	1.7	2.5	0				31.2	4.6472
45	317	1.3	5	46.5	35.6		0.5	0.5	5	0	1.5	2.5	1.6	0				31.4	8.6146
47.4	324	1.8	5	41.5	38.3		2.8	0	2.1	0	2.6	4	1.9	0				31.8	7.56914
49.2	315	2	5.6	51	36		1	0	0.6	0	1.3	1.5	1	0				32.4	3.75822
49.4	305	1	1.4	59.5	28.8		2	0.3	1	0.2	1.8	2.5	1.5	0				33	5.41752
49.8	295	1.5	2	63	27		1.5	0	1.4	0	1.5	1.8	0.3	0				33.6	5.77974
50.4	301	1.7	3	45.2	36.5		2.3	0.8	0.9	0	2.3	5	2.3	0				34	4.82421
51.6	340	2.5	7.5	41	40.7		0.8	1.4	1	0	1.7	1.7	1.7	0				34.2	8.04851
52.2	305	1.2	6	32.1	50.1		4.2	0.9	0	0	0.6	3	1.9	0				34.8	5.95661
53	281	1.7	5	44.3	42.3		1.8	0.4	0.5	0	0.4	1.8	1.8	0				35	5.69801
53.2	282	2.5	6	48.1	34		1.4	0.3	0	0.5	3.4	3.4	0.2	0.2				35.4	4.32432
53.4	292	2.4	4	41	37.8		1.1	0.7	1.2	0.5	3.8	3	4.5	0				36	5.44262
54	302	3.6	4.3	47.8	38.3		1.2	0.3	1.6	0	0.6	2.3	0	0				36.6	5.75685
55	287	2.5	6	55	27.3		0	0	1.2	0	2	3	2.7	0.3				37.2	3.76155
55.8	304	1.6	3	42.5	44.2		2.3	0	1.5	0.3	2.3	1.7	0.6	0				37.8	4.11197
56	281	2.8	1.3	59.8	23.1		4.2	0.3	1	0	1.8	4.5	1.2	0				38	2.90919
56.2	363	3.1	1.5	61.5	23.7		1.3	0.3	0.5	0	1.1	5.5	1.5	0				38.4	3.18584
56.4	326	3	1.8	36.5	44.6		2.9	0	1.5	0	0.9	5.3	3.5	0				39	4.44295
57	270	0.9	1.7	61.1	25.5		4	0	1	0.3	2.5	2	1	0				39.6	2.49243
57.6	275	1.5	1.7	61.8	26.2		2.5	0.7	0.4	0	3	1	1.2	0				40.2	3.50168
58.2	315	2.8	1	37.4	48.5		6.5	0.3	1	0	0	1	1.5	0				40.8	4.43008
60.25	285	3.3	1.5	38	46		2.8	3	1.6	0	0	2	1.8	0				41.4	5.43415
62.5	284	2.5	3.7	36	44		2	5.8	0.6	0	0.8	1.3	3.3	0				42	4.63617
64	282	2.8	1.5	36.2	44.5		3	3.8	0.3	0	0.5	2.8	4.6	0				42.6	3.94473
66	302	1.5	4.5	39.5	41.2		2.5	3.1	0.6	0	0.8	3.1	3.2	0				43.2	5.65667
																		43.8	5.09415
																		44.4	5.84117
																		45	5.41189
																		45.6	5.0547
																		46.2	3.71139
																		46.8	4.25753
																		47.4	5.67914
																		48	5.13834
																		48.6	4.13563
																		49.2	3.59679
																		49.4	3.31139
																		49.8	4.66068
																		50.4	4.31678
																		51	5.38845
																		51.6	4.6
																		52.2	4.73936
																		52.8	4.52821
																		53	4.45603
																		53.2	5.25501
																		53.4	5.41889
																		54	4.54413
																		54.6	4.26246
																		55	5.571
																		55.2	6.04449
																		55.8	4.23868
																		56	4.85149
																		56.2	6.62461
																		56.4	5.7114
																		57	3.23936
																		57.6	4.67146
																		58.2	3.70409
																		58.8	2.98588
																		59.5	2.15647
																		60.25	5.25959
																		61	4.39604
																		61.75	4.42038
																		62.5	6.0202
																		63.25	5.47872
																		64	4.35022
																		64.75	4.07014
																		65.4	4.73625
																		66	5.39486
