# Supplementary material for: Major perturbations in the global carbon cycle and photosymbiont-bearing planktic foraminifera during the early Eocene
Source: Copernicus journal article supplement (doi:10.5194/cp-12-981-2016), 2016-04-15
Supplement: Supplementary file 7 [file Table S4.xlsx]

## Sheet: Sheet1
Table S2: Recalibrated depths and abundances for planktic foraminiferal genera at Site 577 (Lu, 1995)
					[1]	[2]		[3]	[4]	[5]	[1]	[1]	[1]	[1]	[1]
Hole	Core	Section	Interval	Interval	Reported	Core Top	Void	Depth Fix	Offset	Adjusted	No. counted	Relative abundance (%) of total number of counted specimens
			Top (cm)	Base (cm)	Depth (mbsf)	Depth (mbsf)	correction (m)	(mbsf)	(m)	Depth (mcd)	specimens	Acarinids	Morozovellids	Subbotinids	Other
577*	8	3	13	15	66.94	63.8	0	66.94	-3.5	63.44	220	5	0	6	89
577*	8	3	34	36	67.15	63.8	0	67.15	-3.5	63.65	319	65	8	9	18
577*	8	3	48	50	67.29	63.8	0	67.29	-3.5	63.79	311	83	3	6	8
577*	8	3	76	78	67.57	63.8	0	67.57	-3.5	64.07	298	78	3	6	13
577*	8	3	100	102	67.81	63.8	0	67.81	-3.5	64.31	321	66	4	7	23
577*	8	3	138	140	68.19	63.8	0	68.19	-3.5	64.69	306	77	1	1	21
577*	8	4	18	20	68.49	63.8	0	68.49	-3.5	64.99	287	83	5	3	9
577*	8	4	34	36	68.66	63.8	0	68.65	-3.5	65.15	332	75	4	3	18
577*	8	4	48	50	68.79	63.8	0	68.79	-3.5	65.29	301	84	3	1	12
577*	8	4	78	80	69.09	63.8	0	69.09	-3.5	65.59	297	69	2	6	23
577*	8	4	100	102	69.31	63.8	0	69.31	-3.5	65.81	319	86	1	6	7
577*	8	4	138	140	69.69	63.8	0	69.69	-3.5	66.19	296	68	1	6	25
577*	8	5	17	19	69.98	63.8	0	69.98	-3.5	66.48	276	85	3	6	6
577*	8	5	34	36	70.15	63.8	0	70.15	-3.5	66.65	323	61	6	12	21
577*	8	5	57	59	70.38	63.8	0	70.38	-3.5	66.88	262	78	5	3	14
577*	8	5	86	88	70.67	63.8	0	70.67	-3.5	67.17	290	67	9	11	13
577*	8	5	100	102	70.81	63.8	0	70.81	-3.5	67.31	311	64	12	7	17
577*	8	5	137	139	71.18	63.8	0	71.18	-3.5	67.68	269	55	5	1	39
577*	8	6	18	20	71.49	63.8	0	71.49	-3.5	67.99	295	53	9	8	30
577*	8	6	34	36	71.65	63.8	0	71.65	-3.5	68.15	309	54	17	7	22
577*	8	6	57	59	71.88	63.8	0	71.88	-3.5	68.38	274	59	5	2	34
577*	8	6	81	83	72.12	63.8	0	72.12	-3.5	68.62	306	56	9	3	32
577*	8	6	100	102	71.65	63.8	0	72.31	-3.5	68.81	314	48	16	4	32
577*	8	6	140	142	72.71	63.8	0	72.71	-3.5	69.21	288	64	5	1	30
577*	8	7	2	4	72.83	63.8	0	72.83	-3.5	69.33	303	48	14	8	30
577*	8-CC	8	36	38	73.17	63.8	-1.37	73.3	-3.5	69.8	305	49	15	13	23
577*	9	1	30	32	73.61	73.3	0	73.61	0	73.61	280	72	8	10	10
577*	9	1	48	50	73.79	73.3	0	73.79	0	73.79	288	68	8	6	18
577*	9	1	80	82	74.11	73.3	0	74.11	0	74.11	316	73	7	6	14
577*	9	1	104	106	74.35	73.3	0	74.35	0	74.35	347	59	3	17	21
577*	9	1	137	139	74.68	73.3	0	74.68	0	74.68	296	71	2	8	19
577*	9	2	30	32	75.11	73.3	0	75.11	0	75.11	298	55	13	17	15
577*	9	2	47	49	75.28	73.3	0	75.28	0	75.28	302	49	4	16	31
577*	9	2	80	82	75.61	73.3	0	75.61	0	75.61	307	72	6	9	13
577*	9	2	104	106	75.85	73.3	0	75.85	0	75.85	337	68	4	18	10
577*	9	2	136	138	76.17	73.3	0	76.17	0	76.17	288	75	2	7	16
577*	9	3	30	32	76.61	73.3	0	76.61	0	76.61	322	67	10	9	14
577*	9	3	53	55	76.84	73.3	0	76.84	0	76.84	289	73	2	8	17
577*	9	3	80	82	77.11	73.3	0	77.11	0	77.11	307	54	14	12	20
577*	9	3	104	106	77.35	73.3	0	77.35	0	77.35	331	59	16	13	12
577*	9	3	138	140	77.69	73.3	0	77.69	0	77.69	298	61	11	7	21
577*	9	4	30	32	78.11	73.3	0	78.11	0	78.11	334	35	41	8	16
577*	9	4	52	54	78.33	73.3	0	78.33	0	78.33	311	39	23	8	30
577*	9	4	80	82	78.61	73.3	0	78.61	0	78.61	315	37	27	3	33
577*	9	4	104	106	78.85	73.3	0	78.85	0	78.85	347	34	30	4	32
577*	9	4	133	135	78.33	73.3	0	79.14	0	79.14	306	35	32	6	27
577*	9	5	30	32	79.61	73.3	0	79.61	0	79.61	332	39	35	11	15
577*	9	5	80	82	80.11	73.3	0	80.11	0	80.11	310	37	36	11	16
577*	9	5	104	106	80.35	73.3	0	80.35	0	80.35	324	30	26	8	36
577*	9	6	30	32	81.11	73.3	0	81.11	0	81.11	339	17	31	7	45
577*	9	6	53	55	81.34	73.3	0	81.34	0	81.34	303	22	23	15	40
577*	9	6	78	80	81.59	73.3	0	81.59	0	81.59	298	34	19	11	36
577*	9	6	104	106	81.85	73.3	0	81.85	0	81.85	322	20	20	11	49
577*	9-CC	7	2	4	82.63	73.3	-0.3	82.03	0	82.03	308	19	13	11	57
577*	9-CC	7	9	11	82.7	73.3	-0.3	82.1	0	82.1	322	28	16	12	44
577A	8	3	110	112	70.51	66.4	0	70.51	-1.3	69.21	302	48	10	7	35
577A	8	3	143	145	70.84	66.4	0	70.84	-1.3	69.54	317	65	10	3	22
577A	8	4	10	12	71.01	66.4	0	71.01	-1.3	69.71	331	61	17	5	17
577A	8	4	30	32	71.21	66.4	0	71.21	-1.3	69.91	304	65	7	3	25
577A	8	4	47	49	71.38	66.4	0	71.38	-1.3	70.08	327	81	12	2	5
577A	8	4	72	74	71.63	66.4	0	71.63	-1.3	70.33	312	81	9	3	7
577A	8	4	88	90	71.79	66.4	0	71.79	-1.3	70.49	326	63	9	3	25
577A	8	4	110	112	72.01	66.4	0	72.01	-1.3	70.71	316	56	16	3	25
577A	8	4	130	132	72.21	66.4	0	72.21	-1.3	70.91	333	61	4	1	34
577A	8	5	10	12	72.51	66.4	0	72.51	-1.3	71.21	365	62	12	2	24
577A	8	5	30	32	72.71	66.4	0	72.71	-1.3	71.41	334	59	8	2	31
Notes:
[1] Depth reported by Lu (1995).
[2] Depth reported according to drillers table (Shipboard Scientific Party, 1985) and with positions of "CC" intervals from core logs.
[3] Depth in mbsf assuming average interval distance and the above.
[4] Offset of cores from Table S2.
[5] The depth of the sample in floating depth space (meter composite depth - mcd) relative to meter below seafloor (mbsf).
