# Supplementary material for: Major perturbations in the global carbon cycle and photosymbiont-bearing planktic foraminifera during the early Eocene
Source: Copernicus journal article supplement (doi:10.5194/cp-12-981-2016), 2016-04-15
Supplement: Supplementary file 9 [file Table S5.xlsx]

## Sheet: Foglio1
Table S4. Abundances of planktic foraminifera genera and fragmentation index (%) at ODP Hole 1051A
					No. counted	Relative abundance (%) of total number of counted specimens
Hole	Core	Section	cm ±1	mbsf	specimens	Acarinina	Morozovella	Morozovelloides	Subbotinids	Other genera	F index
1051A	38	2	120	353.1	309	56.3	3	1.2	18.8	20.7	2
1051A				356.6	315	52	3.8	0.8	22	21.4	3
1051A				360.8	305	39	4.2	0.5	24	32.3	10
1051A				365.3	321	42.5	4.8	1	26.5	25.2	3
1051A				369.9	335	46.8	3	0.6	28	21.6	5
1051A				370.9	311	50	7.4	0.3	28.3	14	35
1051A				373.9	303	39.6	5.5	0.5	23.1	31.3	10
1051A				376.4	314	54	2.6	0	25.5	17.9	20
1051A				377	338	45.8	10.5	0.8	23.7	19.2	35
1051A				379.5	301	52.1	9.8	1.5	23	13.6	5
1051A				390.1	219	63.3	5		18.3	13.4	53
1051A				394.1	211	57.8	6.2		23.7	12.3	50
1051A				397.65	385	47	9.8		27.5	15.7	5
1051A				401.68	285	45.3	10.8		26.7	17.2	15
1051A				404.18	295	59.3	8.5		21.7	10.5	12
1051A				406.18	336	57.1	7.1		21.1	14.7	10
1051A				409.3	310	37	17.5		15	30.5	15
1051A				409.8	315	57	14.5		15.5	13	10
1051A				412.3	332	62	12		16.3	9.7	12
1051A				413.8	290	55	13.2		15.5	16.3	15
1051A				415.78	327	62	8.5		21	8.5	20
1051A				417.8	375	50.7	14.1		23.5	11.7	10
1051A				419.9	371	49.5	16.9		21.3	12.3	12
1051A				421.9	389	58.3	7.8		23.6	10.3	5
1051A				423.42	350	48	15.1		16	20.9	7
1051A				425.4	307	59.2	18		17.2	5.6	5
1051A				426.9	333	51.6	19.5		19.8	9.1	10
1051A				427.4	263	61.5	13.3		22	3.2	35
1051A				427.91	250	60	14.8		15.2	10	64
1051A				428.5	245	27.7	53.5		13	5.8	18
1051A				430	315	25.5	54		15	5.5	15
1051A				430.5	242	23.5	42		21.5	13	38
1051A				433.5	248	33	38.3		16.1	12.6	35
1051A				433.98	247	24	43		24	9	13
1051A				434.48	223	28	39		22.4	10.6	15
1051A				439.57	293	30	45		19.5	5.5	10
1051A				441.58	282	40.7	41.8		13.1	4.4	50
1051A				444.13	341	35.2	38.7		13.5	12.6	10
1051A				449.69	322	46.3	31.4		15	7.3	12
1051A				452.24	259	31.3	46.3		7	15.4	10
