# Supplementary material for: Major perturbations in the global carbon cycle and photosymbiont-bearing planktic foraminifera during the early Eocene
Source: Copernicus journal article supplement (doi:10.5194/cp-12-981-2016), 2016-04-15
Supplement: Supplementary file [file cp-12-981-2016-supplement-title-page.pdf › cp-12-981-2016-supplement-title-page.pdf]

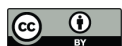

## *Supplement of*

# **Major perturbations in the global carbon cycle and photosymbiont-bearing planktic foraminifera during the early Eocene**

**Valeria Luciani et al.**

*Correspondence to:* Valeria Luciani (valeria.luciani@unife.it)

- cp-12-981-2016-supplement-title-page.pdf
- Supplementary Luciani et al\_
  - .DS\_Store
  - Figure S1.pdf
  - Table S1.xlsx
  - Table S2.xlsx
  - Table S3.xlsx
  - Table S4.xlsx
  - Table S5.xlsx

The copyright of individual parts of the supplement might differ from the CC-BY 3.0 licence.
