# Supplementary figures and images for: Major perturbations in the global carbon cycle and photosymbiont-bearing planktic foraminifera during the early Eocene
Source: Copernicus journal article supplement (doi:10.5194/cp-12-981-2016), 2016-04-15

Figure S1

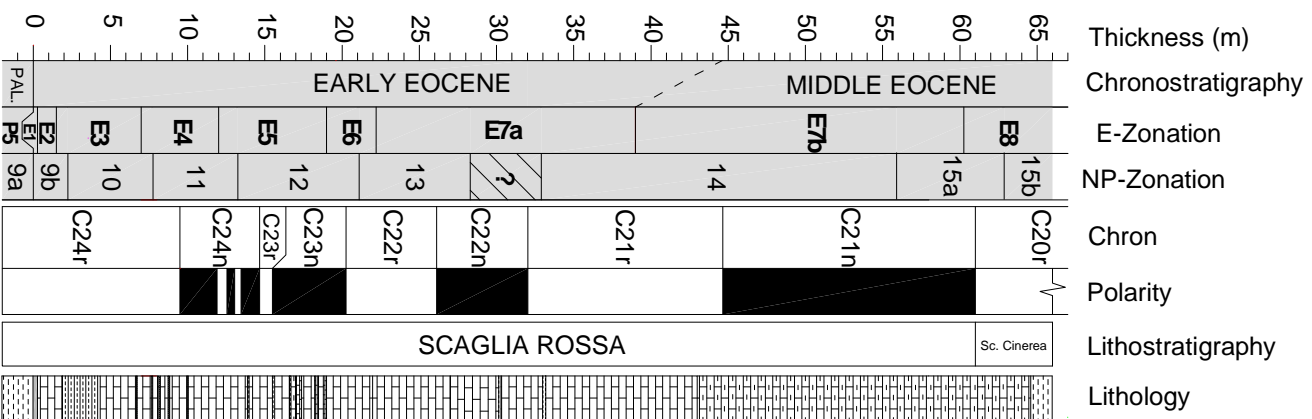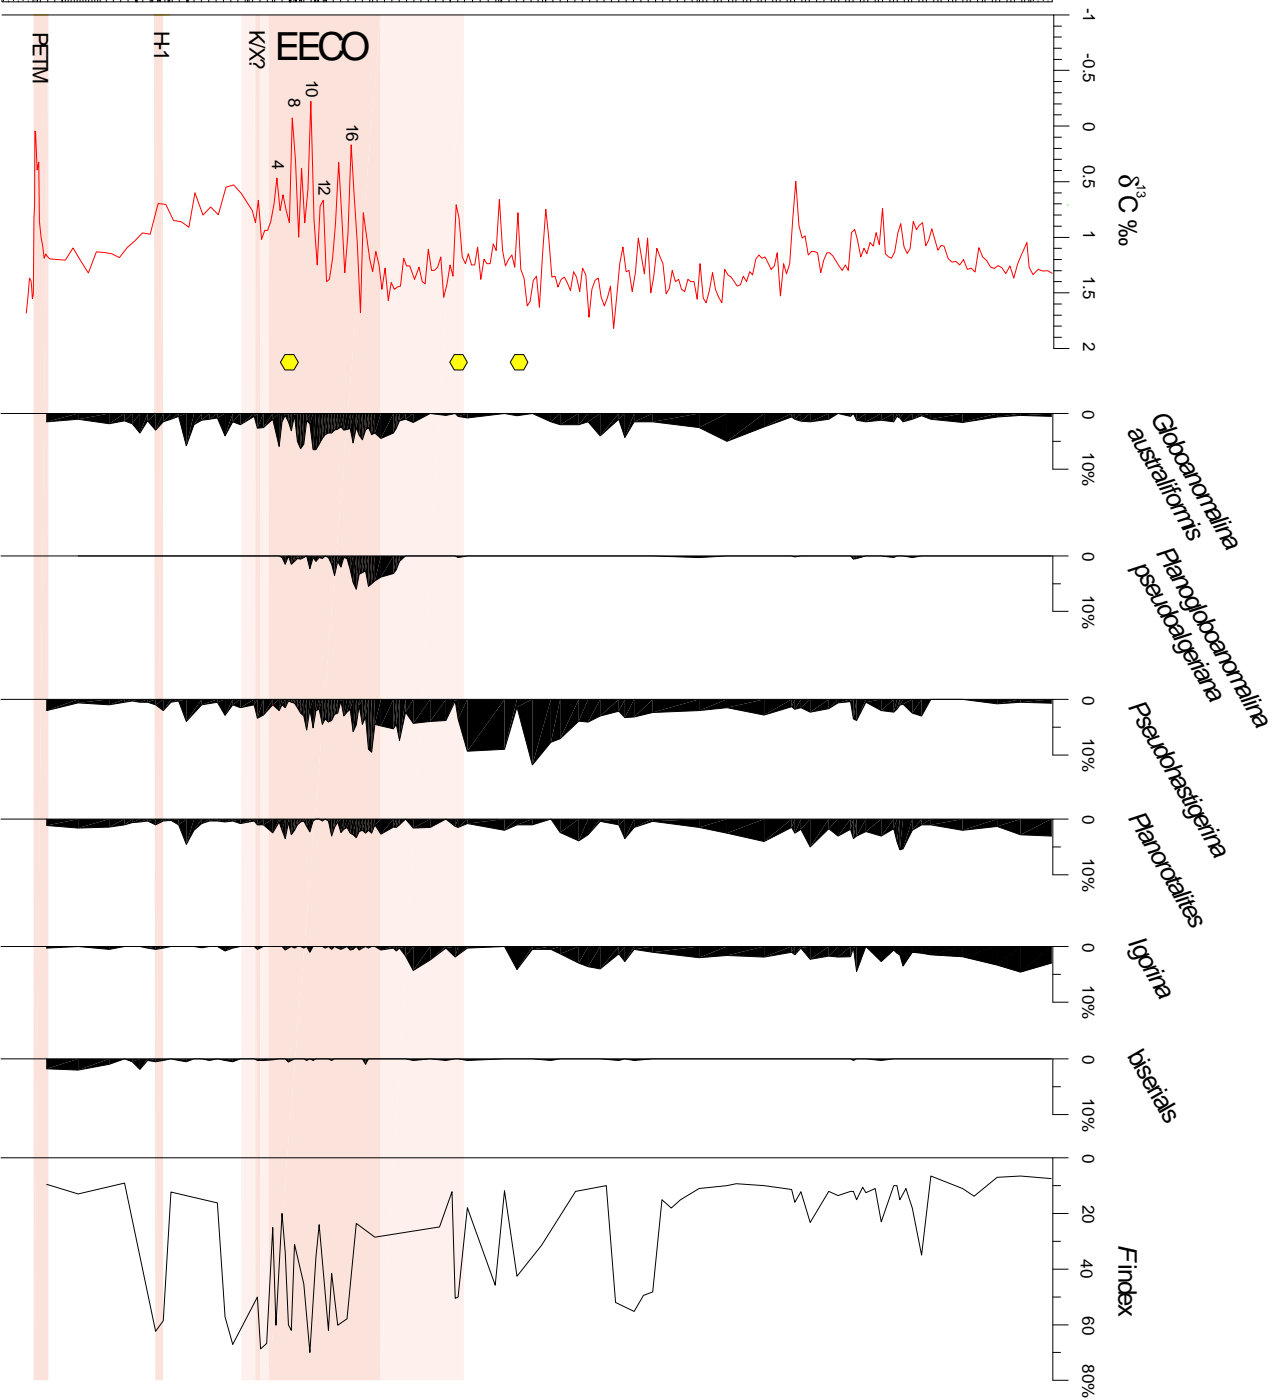

Possagno section

Supplement: Supplementary file 1 [file Figure S1.pdf › Supplementary Luciani et al_/Figure S1.pdf]
